1                   **Carbohydrate and PepO control bimodality in competence**

2                   **development by *Streptococcus mutans***

3                   **Simon A.M. Underhill<sup>1</sup>, Robert C. Shields<sup>2</sup>, Robert A. Burne<sup>2</sup>**

4                   **& Stephen J. Hagen<sup>1\*</sup>**

5                   <sup>1</sup> Department of Physics, University of Florida, 2001 Museum Road, Gainesville, Florida,  
6                   USA 32611

7                   <sup>2</sup> Department of Oral Biology, University of Florida, 1395 Center Drive, Gainesville,  
8                   Florida, USA 32610

9  
10                   **Keywords:** stochastic gene expression, *Streptococcus mutans*, carbohydrate,  
11                   competence, bimodality, feedback, medium composition.

12                   \*Corresponding author

13                   Tel. 352 392 4716

14                   Email: [sjhagen@ufl.edu](mailto:sjhagen@ufl.edu)

15

16

17

18

19

20  
21  
22  
23  
24  
25  
26  
27  
28  
29  
30  
31  
32  
33  
34  
35  
36  
37  
38  
39  
40  
41  
42

## Abstract

In *Streptococcus mutans*, the alternative sigma factor ComX controls entry into genetic competence. Competence signaling peptide (CSP) induces bimodal expression of *comX*, with only a fraction of cells in the population becoming transformable. Curiously, bimodal *comX* activation in response to CSP is affected by peptides in the growth medium and by carbohydrate source. CSP elicits bimodal expression of *comX* in media rich in small peptides, but in defined media lacking small peptides CSP induces no response in *comX*. In addition, growth on certain sugars other than glucose increases the proportion of the population that activates *comX* in response to CSP, relative to growth on glucose. By investigating the connection between media and bimodal *comX* expression, we find evidence for two mechanisms that modulate transcriptional positive feedback in the ComRS system, which is the origin of *comX* bimodality. We find that the endopeptidase PepO suppresses the ComRS feedback loop, most likely by degrading the intracellular XIP/ComS signal. Deletion of *pepO* eliminates bimodality in *comX*, leading to a unimodal *comX* response to CSP in defined and complex media. We also find that CSP upregulates *comR* in a carbohydrate source-dependent fashion, providing an additional stimulus to the ComRS feedback system. Our data provide mechanistic insight into how CSP regulates the bistable competence circuit and explain the puzzle of growth medium-dependence in *S. mutans* competence regulation.

43

## Introduction

44           The Gram-positive bacterium *Streptococcus mutans* inhabits human oral biofilms  
45 and is a primary etiologic agent of dental caries (Loesche, 1986). The ability of *S.*  
46 *mutans* to colonize the oral cavity and compete with commensal organisms is  
47 associated with the *com* regulon. The *com* (competence) regulon controls entry into  
48 genetic competence, a transient state during which cells are able to internalize DNA  
49 from the environment (Shanker; Federle, 2017). In *S. mutans* the *com* regulon is linked  
50 to tolerance of environmental stress, including heat, oxidative stresses, pH and  
51 carbohydrate availability (Qi *et al.*, 2004; Ahn *et al.*, 2005; Ahn *et al.*, 2006; Senadheera,  
52 M. D. *et al.*, 2007; Tremblay *et al.*, 2009; Senadheera, D. B. *et al.*, 2012). It is also  
53 involved in bacteriocin production and lysis, which are important in interspecies  
54 competition (Shanker; Federle, 2017), and in biofilm formation and stability (Li *et al.*,  
55 2002). There are many unresolved questions in the study of *S. mutans* competence,  
56 especially in regard to how the *com* regulon integrates diverse environmental cues,  
57 such as the presence of different signal peptides or nutrients or the composition of the  
58 growth medium, in order to drive different phenotypic outputs in downstream regulated  
59 genes (Hagen; Son, 2017).

60           The quorum sensing peptide CSP (competence stimulating peptide) (Li *et al.*,  
61 2002) is a primary input to the *S. mutans* competence pathway (Fig. 1). CSP is derived  
62 from a 46-residue precursor encoded by *comC*, processed to 21 residue length, then  
63 exported to the extracellular environment by the ComAB transporter. The ComC peptide  
64 is further processed by the extracellular SepM protease to yield the mature 18-residue  
65 CSP, which is understood to be the most active form of the peptide (Hossain; Biswas,

66 2012; Shanker; Federle, 2017). Extracellular CSP stimulates the competence pathway  
67 by interacting with the ComDE two-component signal transduction system (TCSTS):  
68 CSP bound by the transmembrane kinase ComD induces phosphorylation of ComE,  
69 which then acts as a transcriptional activator for several bacteriocin and competence-  
70 related genes, including *cipB* (Perry *et al.*, 2009; Fontaine *et al.*, 2015). Although the  
71 mechanism is not known, expression of *cipB* stimulates the ComRS system, an Rgg-  
72 type signaling system that is the immediate regulator of *comX* (also called *sigX*). ComX  
73 (or SigX) is an alternative sigma factor for late competence genes, which encode  
74 proteins for uptake and processing of DNA. Therefore, CSP drives transformability  
75 through a pathway that includes ComCDE, *cipB*, ComRS and ComX, with the regulatory  
76 link from *cipB* to ComRS being the least understood. However, a signature  
77 characteristic of this pathway (unlike the generally similar pathway in *S. pneumoniae*  
78 (Shanker; Federle, 2017)) is that *comX* responds bimodally (if at all) to CSP: when CSP  
79 is supplied in complex media containing small peptides, *comX* activates in only a  
80 subpopulation of cells, even though *cipB* activates population-wide. In defined media  
81 lacking small peptides, CSP elicits no *comX* response, although *cipB* is again activated  
82 population wide (Son, Minjun *et al.*, 2015; Reck *et al.*, 2015).

83 Bimodality arises in the ComRS system, which lies downstream of *cipB* (Son, M.  
84 *et al.*, 2012). Mashburn-Warren *et al.* (Mashburn-Warren *et al.*, 2010) showed that XIP  
85 (*sigX*-inducing peptide), comprising the C-terminal 7 residues of ComS, can induce  
86 *comX* if supplied exogenously to *S. mutans*. XIP is imported by the Opp permease and  
87 interacts with ComR to form a multimeric complex that is a transcriptional activator for  
88 both *comX* and *comS* (Mashburn-Warren *et al.*, 2010; Son, M. *et al.*, 2012; Fontaine *et*

89 *al.*, 2013; Underhill *et al.*, 2018). XIP induces a population-wide (unimodal) *comX*  
90 response when provided as an extracellular signal in defined growth medium. However  
91 the presence of transcriptional positive feedback via *comS* also allows the ComRS  
92 system to operate as an intracellular positive feedback loop: endogenously produced  
93 ComS apparently interacts with ComR intracellularly to enhance transcription of *comS*  
94 and *comX* (Underhill *et al.*, 2018). Such a feedback mechanism is sensitive to basal  
95 levels of ComR and ComS, which vary stochastically among cells (Dubnau; Losick,  
96 2006). Consequently the positive feedback behavior is heterogeneous and only a  
97 subpopulation flips the ComRS switch by expressing *comX* and *comS* above basal  
98 levels, ultimately resulting in a bimodal distribution of ComX in the population (Fig. 1).

99         How CSP activates this feedback loop remains unclear. The pathway through  
100 which *cipB* (or other upstream elements) stimulates ComRS has not been identified. In  
101 addition, it is not understood why CSP elicits a bimodal *comX* response only in complex  
102 growth medium that contains small peptides. A related question is why CSP elicits no  
103 *comX* response in defined media that lacks small peptides. We have suggested that  
104 small peptides imported from the growth medium could strengthen ComRS feedback –  
105 and thus favor *comX* activation – by competing for an *S. mutans* enzyme that degrades  
106 endogenously produced ComS (Son, M. *et al.*, 2012; Hagen; Son, 2017). However, no  
107 such enzyme has yet been identified. An additional question is what limits the proportion  
108 of cells that activate *comX* in the presence of CSP. Although the number of *comX*-active  
109 cells initially increases as the concentration of exogenous CSP is increased, the  
110 proportion of cells that activate *comX* expression saturates at an upper limit of 30-35%  
111 (Son, M. *et al.*, 2012).

112 A previous study (Moye *et al.*, 2016) identified carbon source as one of the few  
113 parameters – other than complex/defined medium - that alters the proportion of cells  
114 activating the ComRS switch, i.e. the probability of transition from *comX* “OFF” to “ON”.  
115 Single-cell studies found that CSP induced higher ON fractions in fructose- or trehalose-  
116 grown cultures than in glucose-grown cultures (Moye *et al.*, 2016), with trehalose giving  
117 the strongest response. In addition, CSP-stimulated cells growing in maltose or sucrose  
118 expressed a *PcomX-lacZ* (*comX* promoter fusion) reporter at higher levels than did  
119 glucose-grown cells. In addition, growth on trehalose or sucrose led to higher  
120 transformation efficiencies than did growth on glucose. Deletion of the gene for the  
121 global carbon catabolite repression (CCR) mediator CcpA eliminated differences in CSP  
122 response between sugars (Moye *et al.*, 2016). Moye *et al.* (Moye *et al.*, 2016) did not  
123 rule out the possibility that carbohydrate influences *comDE* or *comC* expression.  
124 However, the fact that *cipB* expression already saturates at moderate CSP levels, and  
125 that higher levels of CSP do not increase the fraction of responding cells (Son, M. *et al.*,  
126 2012), suggests that the enhanced *comX* response in media formulated with  
127 carbohydrates other than glucose is not due to upregulation of *comCDE*.

128 Given the link between bimodality and carbohydrate source (Moye *et al.*, 2016),  
129 and our hypothesis that a peptidase could govern bimodality by modulating the strength  
130 of feedback in the ComRS system (Hagen; Son, 2017), we investigated whether *S.*  
131 *mutans* PepO – whose homologs are known to interact with Rgg signaling in other  
132 streptococci (Wilkening *et al.*, 2016) – could mediate the carbohydrate effect in *S.*  
133 *mutans* by interfering with ComRS autoactivation. We studied the relationship between  
134 carbohydrate source and activation of the CSP-induced competence pathway, using

135 fluorescent gene reporter studies of individual cells, and biochemical and transcriptional  
136 approaches. By showing a clear connection between *pepO* and bimodality in ComRS,  
137 and demonstrating carbohydrate-sensitive effects on ComR regulation, our studies  
138 identify two mechanisms by which *S. mutans* controls the proportion of cells that enter  
139 the competent state.

## 140 **Results**

### 141 **Trehalose enhances *comX*, but not *cipB*, activation by CSP**

142 To confirm a previous report (Moye *et al.*, 2016) that growth in trehalose leads to  
143 a greater proportion of *comX*-ON cells in response to CSP than does growth in glucose,  
144 we measured the proportion of *comX*-ON cells as a function of the glucose and  
145 trehalose content of the growth medium. We grew a *PcomX-gfp* reporter strain of *S.*  
146 *mutans* in complex growth medium (TV, *Methods*) containing mixtures of glucose and  
147 trehalose. Ratios of glucose to trehalose were chosen to maintain a constant hexose  
148 concentration of 20 mM, such that  $2[\text{tre}] + [\text{glc}] = 20 \text{ mM}$  (Moye *et al.*, 2016). We added 1  
149  $\mu\text{M}$  CSP-18 to each sample as it reached  $\text{OD}_{600}$  0.1. The fluorescent reporter activity of  
150 individual cells was measured and histogrammed as described in (Kwak *et al.*, 2012).  
151 Growth of the two strains was checked to ensure these effects were not due to poor  
152 growth of the mutant on trehalose admixtures; the  $\Delta\text{treR}$  strain grows poorly on  
153 trehalose but normally in the mixed carbohydrate media (Supplemental Figure S1). Fig.  
154 2A shows that the presence of 0.5 to 1 mM trehalose was sufficient to increase the  
155 proportion of *comX*-ON cells. Repeating the experiment using the same *comX* reporter  
156 in a  $\Delta\text{treR}$  strain showed no effect of trehalose on the proportion of *comX*-ON cells. As a

157  $\Delta treR$  strain lacks the TreR transcriptional activator and does not express *treAB* (Baker  
158 *et al.*, 2018), these findings confirm that the trehalose-induced increase in the proportion  
159 of cells responding to CSP requires activation of the *tre* operon.

160 The activation of *cipB* transcription by phosphorylated ComE is an early step in  
161 the CSP-induced competence pathway (Son, Minjun *et al.*, 2015). We next tested  
162 whether alterations in *cipB* regulation, required for CSP stimulation (Perry *et al.*, 2009),  
163 could be triggered by carbohydrate. In order to test whether carbon source affects the  
164 competence pathway by influencing *cipB* or *comCDE* activity, we studied the effect of  
165 glucose/trehalose on the CSP response of a *PcipB-gfp* reporter strain. Fig. 2B shows  
166 that induction of *cipB* transcription by CSP was not significantly different in cells growing  
167 on trehalose compared to glucose. Fitting the median (in the cell population) *cipB*  
168 expression level to a simple binding isotherm (Hill function with  $n = 1$ ), we find  
169 indistinguishable constants  $K = 2.6 \pm 1.4$  nM for glucose and  $3.0 \pm 0.9$  nM for trehalose.  
170 These data indicate that *cipB* is not differentially regulated in trehalose versus glucose.  
171 The carbohydrate effect on *comX* expression must arise elsewhere than in the CSP-  
172 ComDE circuit.

### 173 **The carbohydrate effect on transformation efficiency is CSP-dependent**

174 Because *S. mutans* maintains a low level of transformability even in the absence  
175 of CSP (Perry *et al.*, 2009), it was necessary to test whether the carbohydrate effect on  
176 transformability occurs through the CSP-induction pathway. We compared the  
177 transformation efficiency of wild-type UA159, a *pepO* mutant and a *comDE* mutant,  
178 grown in TV that contained mixtures of glucose and trehalose, with or without CSP. Fig.  
179 3 shows that in the absence of CSP, the efficiency of transformation of wild-type cells is



180 only slightly lower in glucose than in trehalose ( $P = 0.134$  by Student's  $t$  test). When  
181 CSP is provided, the transformation efficiency of the wild type is significantly greater in  
182 trehalose than in glucose ( $P < 0.001$ ). These data imply that the carbohydrate effect is  
183 facilitated, if not entirely generated, by the CSP induction pathway. Consistent with this  
184 interpretation, we find that the CSP dependent differences in transformability are absent  
185 in the *comDE* deletion, as are significant differences between the different  
186 carbohydrates.

187 Fig. 3 also shows that deletion of *pepO* increases the transformation efficiency  
188 under all conditions, both in the presence and absence of CSP. In the absence of CSP  
189 the  $\Delta pepO$  strain had a roughly 100-fold higher rate of transformation than the wild type  
190 in glucose ( $P < 0.001$ ) and in trehalose ( $P = 0.01$ ). With CSP the difference narrowed to  
191 30-fold in glucose ( $P = 0.038$ ) and 16-fold in trehalose ( $P = 0.064$ ). The  $\Delta pepO$  strain  
192 exhibited a higher statistical significance in the carbohydrate effect (glucose vs.  
193 trehalose) of the non-CSP transformability ( $P = 0.012$ ) than UA159. Therefore, deletion  
194 of *pepO* generally enhances transformability, but it does not eliminate CSP-sensitivity or  
195 the effect of carbohydrate on transformability.

### 196 **Carbohydrate-dependent increases in *comR* transcription in response to CSP**

197 In order to investigate how certain carbohydrates could affect the ComRS  
198 bimodal switch compared to glucose, we used RT-qPCR to compare *comR* transcript  
199 levels (normalized to 16S rRNA) in cells grown in TV supplemented with glucose,  
200 trehalose or maltose, in the presence of 0 nM, 4 nM or 400 nM CSP. Fig. 4A shows that  
201 *comS* transcription was generally elevated in the presence of CSP, as expected if CSP  
202 drives competence by promoting *comS* transcriptional feedback (Hagen; Son, 2017;

203 Underhill *et al.*, 2018). The CSP enhancement of *comS* transcription was greater in the  
204 tested sugars than in glucose and was greater in the *pepO* deletion. Less expected was  
205 the finding (Fig. 4B) that addition of CSP to the wild-type strain in trehalose or maltose  
206 caused a modest but significant 2-3 fold increase ( $P < 0.001$ ) in *comR* transcripts, which  
207 did not occur in glucose. A CSP enhancement of *comR* transcription was also seen in  
208 the  $\Delta pepO$  strain in those carbohydrates. We note that Lemme *et al.* (Lemme *et al.*,  
209 2011) reported a similar, 1.4-1.8-fold upregulation of *comR* in cells that were treated  
210 with CSP in Todd-Hewitt/yeast extract medium. Curiously, we found no significant  
211 increase in *comR* transcripts when CSP was provided to wild-type cells growing in  
212 glucose. The finding that CSP leads to a modest upregulation of *comR* transcription,  
213 especially in the disaccharides tested here, suggests a mechanism by which CSP could  
214 stimulate the ComRS system and promote *comX* activity. As the bistable behavior of the  
215 ComRS feedback system will be sensitive to basal levels of both ComS and ComR,  
216 even a modest upregulation of *comR* by CSP, as occurs in trehalose and maltose,  
217 would promote positive feedback in the ComRS circuit, permitting a larger proportion of  
218 cells to enter the *comX*-ON state.

219 Although our transformation assay (Fig. 3) demonstrated that deletion of *pepO*  
220 enhances *com* activity, Fig. 4C shows that *pepO* transcription was not affected by CSP  
221 in any carbohydrate tested. Therefore CSP does not stimulate *comX* by modulating  
222 *pepO* transcription. This finding is consistent with a model where CSP exerts a greater  
223 effect on *comR* while *pepO* acts through a separate mechanism to suppress  
224 competence activation.

225 As a test for possible effects of other genes proximal to the *tre* operon and *pepO*,  
226 we tested whether the transcription of *smu.2035*, which is located 143 bp downstream  
227 of *pepO* and transcribed in the opposite direction, was affected by CSP or carbohydrate.  
228 Fig. 4D shows that *smu.2035* transcripts decreased slightly in the  $\Delta pepO$  background  
229 relative to the wild type. This may be a consequence of insertion of the antibiotic  
230 resistance cassette in the *pepO* region (*Methods*). However, *smu.2035* showed no  
231 particular response to CSP or carbohydrate in the wild type.

### 232 **Deletion of *pepO* allows population-wide expression of *comX***

233 Figs. 3 and 4 show that deletion of *pepO* increased *comS* transcription and  
234 transformability. However, *pepO* transcription is not modulated by CSP or carbohydrate.  
235 The simplest interpretation of these data is that the endopeptidase PepO acts  
236 constitutively to limit the activation of the ComRS autofeedback loop. We tested this  
237 model by measuring the proportion of cells activating a *PcomX-gfp* reporter in the *pepO*  
238 deletion and in the wild-type background, in three different carbohydrates. Only a  
239 fraction (Fig. 5A, B) of wild-type cells became *PcomX*-active at saturating  
240 concentrations of CSP, where this fraction was greater in trehalose or maltose ( $47 \pm 3$   
241 % and  $38 \pm 5$  % responding, respectively) than in glucose ( $22 \pm 9$  % of cells  
242 responding). The deletion of *pepO* substantially enhanced (Fig. 5C) the level of  
243 activation observed at saturating concentrations of CSP in all three carbohydrates: in  
244 trehalose and maltose, the proportion of *comX*-active cells approaches 100%, while in  
245 glucose it exceeds 90% (Fig. 5D). Therefore the bimodal behavior is largely removed by  
246 the deletion of *pepO* and the competence pathway now responds unimodally to CSP.  
247 Within each strain, the binding parameter *K* (Hill function with  $n = 1$ , Supplemental Table

248 S1) was roughly the same for all sugars ( $K = 11-14$  nM), indicating that the sugar does  
249 not determine the CSP sensitivity threshold. However the  $K$  for the  $\Delta pepO$  strain was 2-  
250 4 nM, which is roughly 2-3-fold lower than in UA159. Therefore, deletion of *pepO*  
251 increased overall sensitivity to CSP in all three carbohydrates, and eliminated the  
252 bimodal character of *comX*, allowing population-wide activation of *comX*.  
253 Complementation of the *pepO* deletion (Fig. 5E) reduced the *comX*-active proportion to  
254 the level of 30-40% similar to the wild type and with a similar  $K = 11 \pm 3$  nM, reverting  
255 behavior to bimodal (Fig. 5F). These data show that PepO is a major limiting factor in  
256 the activity of the ComRS feedback loop, such that *pepO* deletion allows population-  
257 wide *comX* expression in the presence of CSP.

### 258 **PepO is responsible for growth medium-dependent bimodal response to CSP**

259 We have proposed a mechanism where the growth medium dependence of the  
260 *comX* response to CSP is due to intracellular XIP/ComS and small nutrient peptides  
261 from the media competing for degradation by an intracellular peptidase (Son, M. *et al.*,  
262 2012; Hagen; Son, 2017): In defined media that lack the peptides, the peptidase is  
263 available to degrade intracellular XIP/ComS, shutting down ComRS feedback and  
264 preventing *comX* activation. In complex media, the small peptides slow the degradation  
265 of XIP/ComS sufficiently to allow the ComRS feedback loop to autoactivate in some  
266 cells, leading to a population-bimodal *comX* response. If PepO plays the role of this  
267 hypothesized peptidase, then we would expect a *pepO* deletion strain to show an  
268 enhanced *comX* response to CSP in both complex and defined growth media. We  
269 therefore provided CSP to the  $\Delta pepO$  strain in the defined medium FMC, supplemented  
270 with either glucose or trehalose. CSP normally elicits no response from *comX* in FMC

271 medium (Son, M. *et al.*, 2012). However, Fig. 6 shows that even in the absence of CSP  
272 the  $\Delta pepO$  strain was bimodally activated in both trehalose-supplemented FMC and in  
273 FMC formulated with glucose as the sole carbohydrate. Further, as the CSP  
274 concentration was increased to 100-500 nM (in glucose, Fig. 6A) or to 5-10 nM (in  
275 trehalose, Fig. 6B), the *comX* response became unimodal (population-wide). Therefore  
276 deletion of *pepO* eliminated both the bimodality of the *comX* response to CSP and the  
277 requirement for complex growth medium.

### 278 **PepO degrades the ComS-derived signal XIP *in vitro***

279 We have previously shown (Underhill *et al.*, 2018) that the bimodal response of  
280 ComRS and *comX* to CSP arises within an intracellular feedback loop in which  
281 endogenously produced ComS interacts with ComR to drive *comS* and *comX*  
282 transcription. The above data support the interpretation (Son, M. *et al.*, 2012) that the  
283 growth medium dependence of CSP response is due to a peptidase, evidently PepO,  
284 which suppresses autoactivation of the ComRS system by degrading the endogenous  
285 ComS feedback signal. In order to confirm that PepO can break down ComS/XIP and  
286 prevent its interaction with ComR to drive ComRS transcriptional feedback, we tested  
287 whether recombinant PepO (rPepO) from *S. mutans* affected the ability of synthetic XIP  
288 to form a DNA-binding complex with ComR *in vitro*. Fig. 7A shows a fluorescence  
289 polarization (FP) assay in which purified ComR binds a fluorescently labeled DNA probe  
290 containing the *comX* promoter region in the presence of 5  $\mu$ M synthetic XIP that had  
291 been incubated with 500 nM rPepO for different lengths of time. A loss of polarization  
292 was observed when XIP was incubated for more than about 20 minutes, indicating a  
293 loss of XIP-induced binding of ComR to the DNA probe. A greater loss of polarization

294 occurred at higher rPepO concentrations. Fig. 7B shows that 2 h incubation of rPepO  
295 with XIP had little effect on the FP signal if rPepO was present at concentrations below  
296 about 30 nM, but polarization declined substantially for [rPepO] greater than about 100  
297 nM. Fig. 7C shows the FP signal for XIP that was incubated for 5 h at the same rPepO  
298 concentrations as Fig. 7B.

299 As an additional test of rPepO degradation of XIP, we tested whether treatment  
300 with rPepO affected the ability of synthetic XIP to activate *comX* in a reporting strain of  
301 *S. mutans*. Fig. 7D shows fluorescence of a bulk culture of *PcomX-gfp ΔcomS* cells  
302 (incapable of producing their own ComS or XIP) that were provided with 1 μM XIP that  
303 had been incubated with rPepO for 5 hours. The reporter fluorescence of the cells  
304 shows a decline very similar to Fig. 7C as the rPepO concentration is increased,  
305 confirming that rPepO degraded the ability of the XIP to activate *comX*.

306

307

## Discussion

308 Genetic competence in *S. mutans* is influenced by a diverse set of environmental  
309 factors, including peptide content of the medium, pH, oxidative stress and heat  
310 (Senadheera, M. Dilani *et al.*, 2005; Ahn *et al.*, 2006; Tremblay *et al.*, 2009; Okinaga *et*  
311 *al.*, 2010; Son, M. *et al.*, 2012; Guo *et al.*, 2014; De Furio *et al.*, 2017). For *S. mutans*,  
312 the peptide content of the growth medium determines the proportion of cells that  
313 activate *comX* in response to CSP. The response ranges from zero (in defined medium,  
314 lacking small peptides) to partial (bimodal, in complex media). Only direct addition of the  
315 inducing peptide XIP, which when taken up by the Opp oligopeptide permease in

316 defined media interacts directly with ComR to induce *comX*, elicits a population-wide  
317 (unimodal) *comX* response in wild-type *S. mutans*. Moye *et al.* (Moye *et al.*, 2016)  
318 showed that carbon source is an additional modulator of the proportion of cells  
319 responding to CSP by activating *comX*. In particular, growth in the presence of the  
320 disaccharide trehalose not only increases the proportion of *S. mutans* expressing *comX*,  
321 but also increases transformation efficiency. The trehalose catabolic operon is directly  
322 upstream of, and transcribed in the same direction as, the endopeptidase *pepO*. In  
323 investigating the link between carbohydrate source and bimodal activation of *comX*, we  
324 initially hypothesized that the proximity of *pepO* and the *treAB* operon may allow  
325 induction of *treAB* to modify levels of the peptidase. This could lead to higher  
326 intracellular ComS, encouraging autoactivation of the bistable ComRS feedback circuit  
327 that regulates *comX* (Fig. 1) (Son, M. *et al.*, 2012). Although our findings confirm the  
328 trehalose effect originally observed by Moye *et al.* (Moye *et al.*, 2016) and demonstrate  
329 for the first time that PepO plays a key role in modulating bimodal competence  
330 response, the body of our data shows that carbohydrate source and PepO influence the  
331 regulatory pathway through largely independent mechanisms.

332         It was necessary to determine whether the trehalose effect originates with the  
333 bacteriocin genes because the trehalose operon has been linked to bacteriocin  
334 expression (Baker *et al.*, 2018). Our data rule out a role for *cipB* or upstream elements  
335 such as *comCDE* in the effect of trehalose and other carbohydrates tested, because  
336 CSP activation of *cipB* was unaffected by carbohydrate source. The CSP concentration  
337 required to saturate the *cipB* response, and the maximal level of *cipB* expression, was  
338 similar in glucose and trehalose.

339           Figure 8A shows further evidence that carbohydrate affects the competence  
340 pathway downstream of *cipB*. Expression of *cipB* reaches maximum at a lower CSP  
341 concentration (near 5 nM CSP) than does expression of the *PcomX-gfp* reporter (near  
342 100 nM CSP). Therefore, even though *cipB* is required to elicit the *comX* response in  
343 glucose (Perry *et al.*, 2009), trehalose and maltose (Supplemental Figure S2), full  
344 activation of *cipB* is insufficient to induce maximum *comX* response. Evidently,  
345 transmission of the competence signal beyond *cipB* involves an additional mechanism  
346 that requires a higher threshold of CSP, such as activation of an additional gene that is  
347 subject to *comDE* regulation. The carbohydrate source does not affect the threshold  
348 CSP concentration (constant *K* in Table S1) needed to saturate either *cipB* or *comX*  
349 expression. Therefore, the carbohydrate effect on *comX* appears to arise in an  
350 additional mechanism unlinked to *cipB*, whereby CSP leads to upregulation of *comR*  
351 transcription, and where glucose appears to inhibit or interfere with this mechanism.

352           Our data indicate that PepO affects the competence pathway in a different way  
353 than carbohydrate, most likely by degrading basally produced ComS and XIP. This  
354 action inhibits the transcriptional feedback that amplifies fluctuations in ComS levels into  
355 full activation of ComRS and induction of *comX*. If the effect of *comCDE* stimulation is to  
356 increase *comS* or *comR* transcription, then it will help to overcome the suppressive  
357 effect of PepO and permit, in at least some cells, self-activation of the feedback loop  
358 and flipping of the ComRS switch to its ON state. Consistent with this model, our  
359 transcriptional data suggest that in the tested carbohydrates (but not in glucose), CSP  
360 leads to some upregulation of *comR*. Although *comR* transcripts increase only by a  
361 modest 2- to 3-fold, bistable autofeedback systems amplify small fluctuations (Dubnau;



362 Losick, 2006) and a small rise in ComR levels could very plausibly flip some cells from  
363 the *comX*-OFF to the *comX*-ON state.

364         PepO is very strongly implicated in the role of feedback inhibitor because its  
365 deletion drastically enhanced transformability and triggered population-wide expression  
366 of *comX*. A robust, unimodal *comX* response to CSP, which has not otherwise been  
367 observed in *S. mutans*, is then observed even in defined media, where CSP normally  
368 elicits no response from *comX* whatsoever (Son, M. *et al.*, 2012) regardless of  
369 carbohydrate source (Ricomini *et al.*, 2019). Degradation of ComS/XIP by PepO is also  
370 consistent with observations such as the degradation of the RGG2 and three other  
371 small peptides by PepO in *Streptococcus pyogenes* (Wilkening *et al.*, 2016). As PepO  
372 amino acid sequences are ~90% similar across *Streptococcus* spp. (Nguyen *et al.*,  
373 2009), the relatively non-specific degradation of small signal peptides seen in (Alves *et*  
374 *al.*, 2017) is potentially a conserved property of PepO peptidase. Our *in vitro* data  
375 support this interpretation by showing that pre-treatment of XIP or ComS with PepO  
376 inhibits ComR binding to its cognate target, apparently by degrading exogenously  
377 added XIP. We also showed that the effect of PepO on ComR/XIP-dependent activation  
378 of *comX* can be reproduced *in vivo* where treatment of XIP with rPepO prior to addition  
379 to ComS-deficient cells in defined medium eliminates the ability of XIP to activate *comX*  
380 in cells.

381         It appears unlikely that PepO plays a direct role in the carbohydrate effect, as  
382 *pepO* expression was not modulated by CSP or carbohydrate source. PepO is not  
383 controlled through the ComDE circuit and instead acts independently to suppress  
384 autoactivation of ComRS. The model presented in Fig. 8B therefore proposes that

385 PepO acts constitutively to degrade endogenously produced ComS and nutritional  
386 peptides from the medium. The model also includes a parallel, CSP-dependent pathway  
387 – denoted Z – that stimulates *comR* transcription in a CSP-dependent manner, but is  
388 sensitive to carbohydrate source. The efficiency with which CSP is capable of activating  
389 *comR* is thus controlled by the sensitivity of Z to CSP and by carbohydrate source, as  
390 our RT-qPCR data indicate in Fig. 4D.

391 We note that prior transcriptional studies have disagreed on whether or not CSP  
392 increases ComR levels (Lemme *et al.*, 2011; Reck *et al.*, 2015; Moyer *et al.*, 2016). Our  
393 data and model resolve the apparent disagreement, inasmuch as *comR* upregulation  
394 was not observed when CSP was provided in glucose-supplemented chemically defined  
395 medium (Reck *et al.*, 2015), but a 1.4- to 1.8-fold upregulation was detected in THB-Y  
396 medium (Lemme *et al.*, 2011), which contains other carbohydrates, in addition to  
397 glucose, that are presumably able to trigger the carbohydrate-sensitive pathway.

398 Our data still leave unanswered the question of how CSP stimulates ComRS  
399 when glucose is the sole carbohydrate source and ComR levels are unaffected by CSP.  
400 Here, it may be relevant to observe that although the *pepO* mutant growing in the  
401 presence of CSP and glucose activates *comX* far more robustly than in a wild-type  
402 genetic background (Fig. 5C and Fig. 6A), this response still requires a small (5-10 nM)  
403 concentration of CSP. Even in the absence of PepO, the ComRS feedback system is  
404 still weakly repressed, although only modest amounts of CSP are needed to overcome  
405 this repression. Similarly, *comX* does not respond to CSP when a *cipB* deletion strain  
406 grows in the disaccharides tested (Supplemental Fig. S1). All of these results indicate  
407 that *cipB* controls a pathway (denoted Y in Fig. 8B) that operates in all growth media to

408 limit ComRS activation, independently of Z. It is conceivable for example that an  
409 additional peptidase (other than PepO) weakly degrades endogenously produced  
410 ComS/XIP, and that the *cipB* pathway acts to downregulate this peptidase. Such a  
411 model is depicted in Fig. 8B, where CSP has two parallel effects on ComRS: it  
412 downregulates the second protease (pathway Y) while also upregulating *comR*  
413 (pathway Z). This model predicts that in a *pepO* deletion strain in glucose-containing  
414 media (Z not active), the CSP threshold for the *comX* response will be similar to that for  
415 *cipB* activation – as occurs in our data (Fig. 2 and Fig. 5). However, for UA159 growing  
416 in other carbohydrates, the CSP level that is needed to induce such a pathway will be  
417 difficult to predict, owing to the two parallel routes combined with the internal positive  
418 feedback, which is present both in ComRS (Son, M. *et al.*, 2012; Underhill *et al.*, 2018)  
419 and in regulation of *comDE* by ComX (Son, Minjun *et al.*, 2015; Reck *et al.*, 2015).

420 Finally, our results allow some speculation about how the VicRKX sensory  
421 system, which is hypothesized to respond to oxidative stress (De Furio *et al.*, 2017),  
422 links to the competence pathway. A binding site for the VicR response regulator has  
423 been identified in the *pepO* promoter region (Alves *et al.*, 2017), where VicR has been  
424 demonstrated to act as a transcriptional repressor (Senadheera, D. B. *et al.*, 2012).  
425 Thus, the *vicK* deletion results in higher *pepO* expression (Alves *et al.*, 2017), which  
426 should give rise (under our model) to reduced transformability in these mutants. A prior  
427 study showed in fact that deletion of the *vicK* kinase reduces transformability, despite  
428 increasing the production of bacteriocins and *comCDE* mRNA (Senadheera, M. Dilani *et*  
429 *al.*, 2005). A similar pattern is visible in data showing that deleting *clpP* raises *pepO*

430 expression while concurrently lowering *comR* and *comX* expression (Kajfasz *et al.*,  
431 2011).

432

### 433 **Acknowledgments**

434 The authors acknowledge the NIDCR for funding through 1R01DE023339,  
435 1R01DE13239 and 1R01DE12236. We also extend our gratitude to Dr. Livia Alves of  
436 the University of Florida College of Dentistry for the kind gift of rPepO protein and Dr.  
437 Jessica Kajfasz at the University of Florida College of Dentistry for the  $\Delta pepO pepO^+$   
438 complemented strain.

439

## **Materials and Methods**

### 440 **Strains and growth conditions**

441 *S. mutans* wild-type strain UA159 and mutant strains from glycerol freezer stocks  
442 were grown in BBL BHI (Becton, Dickinson and co.) at 37°C in 5% CO<sub>2</sub> overnight. *E. coli*  
443 were grown from glycerol freezer stocks in LB at 37°C shaking overnight. Antibiotics  
444 were used at the following concentrations where resistance is indicated in Table 1:  
445 erythromycin (10 µg ml<sup>-1</sup>), kanamycin (1 mg ml<sup>-1</sup>), spectinomycin (1 mg ml<sup>-1</sup>), ampicillin  
446 (10 µg ml<sup>-1</sup>). For all experiments, strains were washed twice by centrifugation, removal  
447 of supernatant fluids and re-suspension in phosphate buffered saline (PBS), pH 7.2.  
448 Cells were then diluted 20-fold into fresh medium and allowed to grow in the same  
449 incubator conditions until OD<sub>600</sub> reached 0.1. Synthetic CSP-18 (sequence  
450 SGSLSTFFRLFNRSFTQA) was purified to 98% purity and provided by NeoBioSci  
451 (Cambridge, MA, USA).

452

453

**Table 1. Strains and plasmids used**

| Strain or plasmid                     | Characteristics*                                                                                                           | Source or reference                |
|---------------------------------------|----------------------------------------------------------------------------------------------------------------------------|------------------------------------|
| <b><i>S. mutans</i> strains</b>       |                                                                                                                            |                                    |
| <i>PcomX-gfp</i> (plasmid)            | UA159 harboring <i>PcomX-gfp</i> promoter fusion on pDL278, Sp <sup>R</sup>                                                | (Son, M. <i>et al.</i> , 2012)     |
| $\Delta pepO$                         | <i>pepO</i> gene replaced with NP resistance cassette, Km <sup>R</sup>                                                     | This study.                        |
| <i>PcomX-gfp</i> $\Delta pepO$        | $\Delta pepO$ harboring <i>PcomX-gfp</i> promoter fusion on pDL278, Sp <sup>R</sup> Km <sup>R</sup>                        | This study.                        |
| $\Delta pepO pepO^+$                  | $\Delta pepO$ (Em <sup>R</sup> deletion) with <i>pepO</i> complemented (Km <sup>R</sup> )                                  | (Alves <i>et al.</i> , 2017)       |
| <i>PcomX-gfp</i> $\Delta pepO pepO^+$ | $\Delta pepO pepO^+$ harboring <i>PcomX-gfp</i> promoter fusion on pDL278, Sp <sup>R</sup> Km <sup>R</sup> Em <sup>R</sup> | This study.                        |
| <i>PcipB-gfp</i>                      | UA159 harboring <i>PcipB-gfp</i> promoter fusion on pDL278, Sp <sup>R</sup>                                                | (Son, Minjun <i>et al.</i> , 2015) |

|                                            |                                                                                                                                    |                                  |
|--------------------------------------------|------------------------------------------------------------------------------------------------------------------------------------|----------------------------------|
| $\Delta comDE$                             | <i>comDE</i> replaced with NP resistance cassette, Sp <sup>R</sup>                                                                 | (Shields <i>et al.</i> , 2017)   |
| <b><i>E. coli</i> strains</b>              |                                                                                                                                    |                                  |
| BL21(DE3)                                  | Used for recombinant protein expression                                                                                            | New England Biolabs, MA          |
| <b>Plasmids</b>                            |                                                                                                                                    |                                  |
| pDL278                                     | <i>E. coli</i> – <i>Streptococcus</i> shuttle vector, Sp <sup>R</sup>                                                              | (LeBlanc <i>et al.</i> , 1992)   |
| pIB184                                     | Shuttle expression plasmid with the P23 constitutive promoter, Em <sup>R</sup>                                                     | (Biswas <i>et al.</i> , 2008)    |
| pET45b(+) <i>his-comR</i> <sub>UA159</sub> | pET45b(+) derivative containing the translational fusion P <sub>T7lac</sub> -6 <i>xhis-comR</i> <sub>UA159</sub> , Ap <sup>r</sup> | (Underhill <i>et al.</i> , 2018) |

454 \*Em = erythromycin, Sp = spectinomycin, Km = kanamycin, Ap = ampicillin

455

456

**Table 2. Oligonucleotides used**

| Purpose                                 | Sequence (restriction enzyme sites underlined) |
|-----------------------------------------|------------------------------------------------|
| <i>pepO</i> deletion upstream           | ATGCCAGACAGTAGCGATTTTAGCA                      |
| BamHI - <i>pepO</i> deletion upstream   | ATGCGGATCCGTGGTTTATCATCAGGAATGAC               |
| BamHI - <i>pepO</i> deletion downstream | ATGCGGATCCTCCACCAAGAATTTGCGGTTA                |
| <i>pepO</i> deletion downstream         | ATGCTATCGGCGCTAAGGTCACTAT                      |
| <i>pepO</i> deletion sequencing 1       | ATGCTGCTGAAACAGTTGAGCTAGA                      |
| <i>pepO</i> deletion sequencing 2       | ATGCTCATCCTTGATAAACATCCTGTTCTAA                |
| <i>pepO</i> deletion sequencing 3       | ATGCTGTTACAATAGAAAGCGT                         |
| <i>pepO</i> deletion sequencing 4       | ATGCAAAGTAGATATCTACCAAATAATAACA                |
| 16S fwd qPCR                            | CCTACGGGAGGCAGCAGTAG                           |
| 16S rev qPCR                            | CAACAGAGCTTTACGATCCGAAA                        |
| <i>comR</i> fwd qPCR                    | TATTACGAAGGCCAACCTAT                           |
| <i>comR</i> rev qPCR                    | TTCTTCTTCAGGCAAATCAT                           |
| <i>comS</i> fwd qPCR                    | TCAAAAAGAAAGGAGAATAACA                         |
| <i>comS</i> rev qPCR                    | TCATCGGAGATAAGGGCTGT                           |
| <i>pepO</i> fwd qPCR                    | TTGCTTCCAACATAGCCAC                            |
| <i>pepO</i> rev qPCR                    | TTACCTTTGTCATTACCTTCAGC                        |
| Smu.2035 fwd qPCR                       | TTCTGATATCCATGACGCTT                           |
| Smu.2035 rev qPCR                       | AGAGCCGTTGTATCTGAATA                           |

457

458

## 459 **Construction of *pepO* deletion mutant**

460 The *pepO* gene was replaced by a non-polar kanamycin cassette in *S. mutans*  
461 strain UA159 by homologous recombination. PCR primers (Table 2) with ends  
462 containing a *Bam*HI recognition site were used to amplify the flanking regions of the  
463 gene. Ends were digested with *Bam*HI to ligate the flanking region product to the  
464 kanamycin cassette. The resulting linear DNA was transformed into UA159 in which  
465 competence was induced by XIP in the defined medium FMC (Terleckyj *et al.*, 1975).  
466 The transformants were confirmed by PCR and Sanger sequencing to ensure that the  
467 *pepO* gene was deleted and the sequences flanking *pepO* that were used for the  
468 recombination event were intact. Previously described fluorescent protein reporter  
469 fusion constructs (Son, M. *et al.*, 2012) were transformed as needed to generate strains  
470 for use in experiments.

## 471 **Development of buffered TV medium**

472 The pH of tryptone-vitamin (TV) medium was found to be approximately 6.7. Due  
473 to the influence of pH on the *com* regulon (Guo *et al.*, 2014; Son, M. *et al.*, 2015), a  
474 medium buffered at a pH close to 7 was desired. A phosphate buffer (170 mM KH<sub>2</sub>PO<sub>4</sub>,  
475 720 mM K<sub>2</sub>HPO<sub>4</sub>) was diluted into TV medium 100-, 80-, 50- or 10-fold and cells from  
476 overnight cultures were diluted 20-fold into the differently buffered media. The resulting  
477 cell suspensions plus an unbuffered control were put into a well plate (Falcon 24 well  
478 plate, Corning inc.) and growth was monitored by measuring the OD<sub>600</sub> every 5 minutes  
479 in a Biotek Synergy 2 plate reader (Biotek Instruments, inc.). It was found that the 80-  
480 fold dilution was the highest concentration of buffer that did not inhibit growth of *S.*  
481 *mutans* (Supplemental Figure S3) so medium buffered in this was used for all



482 carbohydrate experiments involving TV. The initial pH of the buffered TV was 7.2, which  
483 is known to be permissive for competence signaling by CSP (Guo *et al.*, 2014; Son, M.  
484 *et al.*, 2015).

### 485 **Single cell experiments**

486 For single-cell experiments involving planktonic growth in different carbohydrates  
487 in the presence of CSP, a chromosomally integrated *P<sub>comX</sub>-gfp* reporter strain was  
488 used. Cells were diluted 20-fold from overnight cultures into buffered TV supplemented  
489 with the desired carbohydrate(s) at final concentrations of 20 mM for monosaccharides  
490 and 10 mM for disaccharides. When the cells reached an OD<sub>600</sub> of 0.1, 1 μM CSP-18  
491 was added and the cultures were incubated for 2 h. At this point, cultures were gently  
492 sonicated using a Fisher Scientific FB120 sonic dismembrator probe to break up long  
493 chains and pipetted onto a glass coverslip. Phase contrast and fluorescence imaging  
494 were performed at 60x magnification on a Nikon TE2000U phase contrast microscope  
495 followed by image analysis, as described previously (Kwak *et al.*, 2012). The  
496 percentage of cells deemed to be expressing *comX* was determined using a two-  
497 distribution fit to the bimodal data (see below).

### 498 **Concurrent monitoring of growth and fluorescence**

499 Well plate experiments were carried out in a Falcon 96 well plate with clear  
500 bottom and black side (Corning, Inc.). 200 μL of culture was pipetted into each well and  
501 covered with mineral oil to prevent evaporation and oxygen diffusion. Fluorescence and  
502 OD<sub>600</sub> were read in a Biotek Synergy 2 plate reader (Biotek Instruments).

### 503 **Transformation efficiency assay**

504 Cells were prepared for each transformation efficiency assay from overnight  
505 cultures as for the CSP experiments described above. DNA used for transformation was  
506 plasmid pIB184, carrying an erythromycin (Em) resistance marker, added at a  
507 concentration of 600 ng ml<sup>-1</sup>. At OD<sub>600</sub> of 0.1, DNA was added to the cells and tubes  
508 were mixed by inversion; at this point CSP was added where used. After 4 hours of  
509 exposure to DNA, cells without CSP (or *comDE* mutants in all cases, as these do not  
510 respond to CSP (Perry *et al.*, 2009)) were diluted and plated on BHI supplemented with  
511 10 µg ml<sup>-1</sup> erythromycin. A no-DNA control from each sugar was plated on BHI-  
512 erythromycin in order to verify that no spontaneously resistant variants arose during the  
513 incubation. Total viable cell counts were obtained by plating the diluted cultures onto  
514 BHI agar with no antibiotics. Efficiency was calculated by dividing the number of  
515 transformants per microliter plated by the total viable cell count per microliter plated,  
516 correcting for dilution and concentration factors appropriately.

### 517 **Calculating the *comX*-active proportion of cells**

518 The double peaked (bimodal) distribution of *PcomX* activity under CSP  
519 stimulation was found empirically to be well characterized as a combination of two well-  
520 separated gamma distribution functions (Friedman *et al.*, 2006; Taniguchi *et al.*, 2010)  
521 (as in Figure 1), corresponding to *comX*-ON and OFF cells respectively. For cells  
522 responding bimodally to CSP, the histogram  $P(F)$  of *PcomX* fluorescence  $F$  can then be  
523 fit to obtain a parameter  $\lambda$  ( $0 \leq \lambda \leq 1$ ) equal to the proportion of cells in which *comX* is  
524 active:

$$525 \quad P(F) = (1 - \lambda)H(F|a, b) + \lambda G(F|c, d)$$

526 Here  $H$  is the gamma distribution with shape parameters  $a$  and  $b$ , describing the OFF  
527 cells, and  $G$  is the gamma distribution with parameters  $c$  and  $d$ , describing the ON cells.  
528 In experiments when  $P_{comX}$  activity was nearly unimodal (single peaked), this fit did  
529 not determine all parameters robustly, and so the  $comX$ -active proportion  $\lambda$  was found  
530 by a cutoff method, based on counting the proportion of cells whose fluorescence  $F$   
531 exceeds a cutoff value  $F_c$ . We chose the cutoff  $F_c$  by identifying the value that, for a  
532 comparable dataset where  $P_{comX}$  activity is strongly bimodal, minimizes the probability  
533 that a simple cutoff wrongly assigns a cell to either the ON or OFF distribution. That is,  
534 the fluorescence cutoff  $F_c$  was chosen to minimize

$$535 \quad P(\text{error}) = \int_{F_c}^{\infty} H dF + \int_0^{F_c} G dF$$

536 Hill functions were fit to data exhibiting saturating behavior using a Hill function  
537 model with  $n$  set to 1 and hence two free parameters, the saturating height and  $K$ . Fits  
538 were performed by the chi squared nonlinear fitting method and error in parameters  
539 estimated by a 1000 iteration bootstrap for each data set.

#### 540 ***In vitro* degradation of XIP by PepO**

541 Purified recombinant PepO (rPepO) was a kind gift of Livia Alves and Dr.  
542 Jacqueline Abranches of the University of Florida College of Dentistry. Purified protein  
543 was frozen in PBS pH 7.2 with 10% glycerol. The concentration of rPepO in solution  
544 was estimated from its absorbance at 280 nm. XIP was treated with rPepO by diluting  
545 XIP from 10 mM phosphate buffer at pH 7.0 (5.8 mM  $K_2HPO_4$ , 4.2 mM  $KH_2PO_4$ ) with  
546 indicated concentrations of rPepO. The mixtures were then incubated at 37°C for 5  
547 hours before addition to cells.

548 To detect how much XIP was left, the rPepO-XIP mixtures were added to  
549 *PcomX-gfp ΔcomS* plasmid-based reporter cells at OD<sub>600</sub> 0.1 in a ratio of 1:4 (such that  
550 the XIP mixture was 5-fold diluted into the cell culture) in a 96-well plate and OD<sub>600</sub> and  
551 green fluorescence was recorded every 5 min. The GFP fluorescence was normalized  
552 to OD<sub>600</sub> and averaged over the same time period for each sample corresponding to the  
553 time between onset and decline of the fluorescence peak. The data were plotted using  
554 the standard deviation of F/OD<sub>600</sub> values over this time as error bars.

### 555 **Fluorescence polarization using rPepO-treated XIP and ComS**

556 Native ComR was purified by previously reported methods (Underhill *et al.*,  
557 2018). Briefly, *E. coli* BL21 (DE3) cells containing a plasmid harboring N-terminally  
558 tagged 6x His-ComR were lysed and the ComR purified by Ni-NTA affinity  
559 chromatography. The histidine tag was cleaved using EKMax enterokinase (Invitrogen),  
560 and the resulting ComR dialyzed into PBS pH 7.4. Concentration was estimated using  
561 the Pierce bicinchonic acid (BCA) assay (Thermo Scientific). The purified protein was  
562 used with the same Bodipy-FL-X labeled fluorescent DNA aptamer and binding assay  
563 buffer as described elsewhere (Underhill *et al.*, 2018) to assess the ability of rPepO-  
564 treated XIP to induce ComR binding of the *PcomX* DNA region.

565 XIP (5 μM) was treated with the indicated concentrations of rPepO in phosphate  
566 buffer. After 2 and 5 hours, 40 μL of the XIP-rPepO solutions were pipetted into a well  
567 containing 160 μL of binding buffer, 1 nM fluorescent DNA and sufficient ComR to  
568 obtain 1 μM final concentration in the 200 μL volume. Fluorescence polarization was  
569 then measured by a Biotek Synergy 2 plate reader (Biotek Instruments inc.) in a 96-well  
570 black-bottomed, black-side assay plate in polarization mode using a 485 nm excitation

571 filter and 528 nm emission filter. The same experiment was then performed using 5  $\mu$ M  
572 XIP and 500 nM rPepO and taking polarization measurements at the indicated time  
573 points.

#### 574 **Reverse transcriptase-quantitative PCR (RT-qPCR)**

575 Cells for RT-qPCR were grown to  $OD_{600} = 0.1$  in TV supplemented with the  
576 indicated sugar from 20-fold dilution from washed overnight cultures. At this point, CSP  
577 was added to samples and the cultures were incubated for 2 h before centrifugation and  
578 removal of the TV. One ml of TRIzol reagent (ThermoFisher) was then added, the pellet  
579 was resuspended, and cells were mechanically lysed in a bead beater in the presence  
580 of 100  $\mu$ m glass beads. Extraction of RNA was then performed following the TRIzol  
581 phenol:chloroform method (Chomczynski, 1993) and the resulting RNA sample treated  
582 with the Turbo DNA-free<sup>TM</sup> kit from ThermoFisher.

583 RNA concentration was estimated using absorbance at 260 nm and 1  $\mu$ g was  
584 reverse transcribed using iScript reverse transcription mix (Biorad) containing random  
585 primers. Resulting cDNA was diluted 50-fold in water and used as the basis for qPCR  
586 reactions. qPCR was performed using iTaq<sup>TM</sup> SYBR Green Supermix (Biorad) in a  
587 Biorad CFX Connect thermal cycler. Transcript counts for genes of interest were  
588 normalized to a count of 16S rRNA for the same volume of sample. Three biological  
589 replicates of each condition were grown and three independent technical replicates  
590 assayed for each of these. Resulting values of transcript count divided by 16S rRNA  
591 count were averaged to compute reported values. Standard deviations of mRNA counts  
592 in technical replicates were propagated forward to the calculated quotient and the  
593 computed error used to represent error bars.

594 **CSP activity in defined medium**

595 To examine the influence of CSP on *comX* expression in a *pepO* mutant in  
596 defined medium, FMC, was supplemented with the indicated sugar (20 mM for glucose,  
597 10 mM for trehalose) (Terleckyj *et al.*, 1975). The experiment was otherwise performed  
598 exactly as the single cell experiments in TV medium.

599

600 **References**

- 601 Ahn, S.J., Lemos, J.A., and Burne, R.A. (2005) Role of HtrA in growth and competence  
602 of *Streptococcus mutans* UA159. *J Bacteriol* **187**: 3028-3038.
- 603 Ahn, S.J., Wen, Z.T., and Burne, R.A. (2006) Multilevel control of competence  
604 development and stress tolerance in *Streptococcus mutans* UA159. *Infect Immun* **74**:  
605 1631-1642.
- 606 Alves, L.A., Harth-Chu, E., Palma, T.H., Stipp, R.N., Mariano, F.S., Höfling, J.F., *et al.*  
607 (2017) The two-component system VicRK regulates functions associated with  
608 *Streptococcus mutans* resistance to complement immunity. *Mol oral Microbiol* **32**: 419-  
609 431.
- 610 Baker, J.L., Lindsay, E.L., Faustoferri, R.C., To, T.T., Hendrickson, E.L., He, X., *et al.*  
611 (2018) Characterization of the trehalose utilization operon in *Streptococcus mutans*  
612 reveals that the TreR transcriptional regulator is involved in stress response pathways  
613 and toxin production. *J Bacteriol* **200**:e00057-18: .
- 614 Biswas, I., Jha, J.K., and Fromm, N. (2008) Shuttle expression plasmids for genetic  
615 studies in *Streptococcus mutans*. *Microbiology* **154**: 2275-2282.
- 616 Chomczynski, P. (1993) A reagent for the single-step simultaneous isolation of RNA,  
617 DNA and proteins from cell and tissue samples. *BioTechniques* **15**: 532.
- 618 De Furio, M., Ahn, S.J., Burne, R.A., and Hagen, S.J. (2017) Oxidative Stressors Modify  
619 the Response of *Streptococcus mutans* to Its Competence Signal Peptides. *Appl*  
620 *Environ Microbiol* **83**: e01345-17.
- 621 Dubnau, D., and Losick, R. (2006) Bistability in bacteria. *Mol Microbiol* **61**: 564-572.

- 622 Fontaine, L., Goffin, P., Dubout, H., Delplace, B., Baulard, A., Lecat-Guillet, N., *et al.*  
623 (2013) Mechanism of competence activation by the ComRS signalling system in  
624 streptococci. *Mol Microbiol* **87**: 1113-1132.
- 625 Fontaine, L., Wahl, A., Fléchar, M., Mignolet, J., and Hols, P. (2015) Regulation of  
626 competence for natural transformation in streptococci **33**: 343-360.
- 627 Friedman, N., Cai, L., and Xie, X.S. (2006) Linking stochastic dynamics to population  
628 distribution: an analytical framework of gene expression. *Phys Rev Lett* **97**: 168302.
- 629 Guo, Q., Ahn, S.J., Kaspar, J., Zhou, X., and Burne, R.A. (2014) Growth phase and pH  
630 influence peptide signaling for competence development in *Streptococcus mutans*. *J*  
631 *Bacteriol* **196**: 227-236.
- 632 Hagen, S.J., and Son, M. (2017) Origins of heterogeneity in *Streptococcus mutans*  
633 competence: interpreting an environment-sensitive signaling pathway. *Phys Biol* **14**:  
634 015001.
- 635 Hossain, M.S., and Biswas, I. (2012) An extracellular protease, SepM, generates  
636 functional competence-stimulating peptide in *Streptococcus mutans* UA159. *J Bacteriol*  
637 **194**: 5886-5896.
- 638 Kajfasz, J.K., Abranches, J., and Lemos, J.A. (2011) Transcriptome analysis reveals  
639 that ClpXP proteolysis controls key virulence properties of *Streptococcus mutans*.  
640 *Microbiology* **157**: 2880-2890.
- 641 Kwak, I.H., Son, M., and Hagen, S.J. (2012) Analysis of gene expression levels in  
642 individual bacterial cells without image segmentation. *Biochem Biophys Res Commun*  
643 **421**: 425-430.
- 644 LeBlanc, D.J., Lee, L.N., and Abu-Al-Jaibat, A. (1992) Molecular, genetic, and functional  
645 analysis of the basic replicon of pVA380-1, a plasmid of oral streptococcal origin.  
646 *Plasmid* **28**: 130-145.
- 647 Lemme, A., Grobe, L., Reck, M., Tomasch, J., and Wagner-Dobler, I. (2011)  
648 Subpopulation-specific transcriptome analysis of competence-stimulating-peptide-  
649 induced *Streptococcus mutans*. *J Bacteriol* **193**: 1863-1877.
- 650 Li, Y.H., Tang, N., Aspiras, M.B., Lau, P.C., Lee, J.H., Ellen, R.P., and Cvitkovitch, D.G.  
651 (2002) A quorum-sensing signaling system essential for genetic competence in  
652 *Streptococcus mutans* is involved in biofilm formation. *J Bacteriol* **184**: 2699-2708.
- 653 Loesche, W.J. (1986) Role of *Streptococcus mutans* in human dental decay. *Microbiol*  
654 *Rev* **50**: 353-380.

- 655 Mashburn-Warren, L., Morrison, D.A., and Federle, M.J. (2010) A novel double-  
656 tryptophan peptide pheromone controls competence in *Streptococcus* spp. via an Rgg  
657 regulator. *Mol Microbiol* **78**: 589-606.
- 658 Moye, Z.D., Son, M., Rosa-Alberty, A.E., Zeng, L., Ahn, S.J., Hagen, S.J., and Burne,  
659 R.A. (2016) Effects of Carbohydrate Source on Genetic Competence in *Streptococcus*  
660 *mutans*. *Appl Environ Microbiol* **82**: 4821-4834.
- 661 Nguyen, T., Zhang, Z., Huang, I., Wu, C., Merritt, J., Shi, W., and Qi, F. (2009) Genes  
662 involved in the repression of mutacin I production in *Streptococcus mutans*.  
663 *Microbiology* **155**: 551-556.
- 664 Okinaga, T., Niu, G., Xie, Z., Qi, F., and Merritt, J. (2010) The *hdrRM* operon of  
665 *Streptococcus mutans* encodes a novel regulatory system for coordinated competence  
666 development and bacteriocin production. *J Bacteriol* **192**: 1844-1852.
- 667 Perry, J.A., Jones, M.B., Peterson, S.N., Cvitkovitch, D.G., and Lévesque, C.M. (2009)  
668 Peptide alarmone signalling triggers an auto-active bacteriocin necessary for genetic  
669 competence. *Mol Microbiol* **72**: 905-917.
- 670 Qi, F., Merritt, J., Lux, R., and Shi, W. (2004) Inactivation of the *ciaH* Gene in  
671 *Streptococcus mutans* diminishes mutacin production and competence development,  
672 alters sucrose-dependent biofilm formation, and reduces stress tolerance. *Infect Immun*  
673 **72**: 4895-4899.
- 674 Reck, M., Tomasch, J., and Wagner-Döbler, I. (2015) The Alternative Sigma Factor  
675 SigX Controls Bacteriocin Synthesis and Competence, the Two Quorum Sensing  
676 Regulated Traits in *Streptococcus mutans*. *PLOS Genetics* **11**: e1005353.
- 677 Ricomini, F., Antonio, P., Khan, R., Åmdal, H.A., and Petersen, F.C. (2019) Conserved  
678 pheromone production, response and degradation by *Streptococcus mutans*.  
679 *bioRxiv*635508.
- 680 Senadheera, D.B., Cordova, M., Ayala, E.A., Chavez de Paz, L.E., Singh, K., Downey,  
681 J.S., *et al.* (2012) Regulation of bacteriocin production and cell death by the VicRK  
682 signaling system in *Streptococcus mutans*. *J Bacteriol* **194**: 1307-1316.
- 683 Senadheera, M.D., Lee, A.W., Hung, D.C., Spatafora, G.A., Goodman, S.D., and  
684 Cvitkovitch, D.G. (2007) The *Streptococcus mutans vicX* gene product modulates  
685 *gtfB/C* expression, biofilm formation, genetic competence, and oxidative stress  
686 tolerance. *J Bacteriol* **189**: 1451-1458.
- 687 Senadheera, M.D., Guggenheim, B., Spatafora, G.A., Huang, Y.C., Choi, J., Hung,  
688 D.C.I., *et al.* (2005) A VicRK Signal Transduction System in *Streptococcus mutans*  
689 Affects *gtfBCD*, *gbpB*, and *ftf* Expression, Biofilm Formation, and Genetic Competence  
690 Development. *J Bacteriol* **187**: 4064-4076.



691 Shanker, E., and Federle, J.M. (2017) Quorum Sensing Regulation of Competence and  
692 Bacteriocins in *Streptococcus pneumoniae* and *mutans*. *Genes* **8**: 15.

693 Shields, R.C., O'Brien, G., Maricic, N., Kesterson, A., Grace, M., Hagen, S.J., and  
694 Burne, R.A. (2017) Genome-wide screens reveal new gene products that influence  
695 genetic competence in *Streptococcus mutans*. *J Bacteriol* **200**: e00508-17.

696 Son, M., Ahn, S., Guo, Q., Burne, R.A., and Hagen, S.J. (2012) Microfluidic study of  
697 competence regulation in *Streptococcus mutans*: environmental inputs modulate  
698 bimodal and unimodal expression of *comX*. *Mol Microbiol* **86**: 258-272.

699 Son, M., Ghoreishi, D., Ahn, S.J., Burne, R.A., and Hagen, S.J. (2015) Sharply Tuned  
700 pH Response of Genetic Competence Regulation in *Streptococcus mutans*: a  
701 Microfluidic Study of the Environmental Sensitivity of *comX*. *Appl Environ Microbiol* **81**:  
702 5622-5631.

703 Son, M., Shields, R.C., Ahn, S., Burne, R.A., and Hagen, S.J. (2015) Bidirectional  
704 signaling in the competence regulatory pathway of *Streptococcus mutans*. *FEMS*  
705 *Microbiol Lett* **362**: fnv159-fnv159.

706 Taniguchi, Y., Choi, P.J., Li, G., Chen, H., Babu, M., Hearn, J., *et al.* (2010) Quantifying  
707 *E. coli* Proteome and Transcriptome with Single-Molecule Sensitivity in Single Cells.  
708 *Science* **329**: 533.

709 Terleckyj, B., Willett, N.P., and Shockman, G.D. (1975) Growth of several cariogenic  
710 strains of oral streptococci in a chemically defined medium. *Infect Immun* **11**: 649-655.

711 Tremblay, Y.D.N., Lo, H., Li, Y., Halperin, S.A., and Lee, S.F. (2009) Expression of the  
712 *Streptococcus mutans* essential two-component regulatory system VicRK is pH and  
713 growth-phase dependent and controlled by the LiaFSR three-component regulatory  
714 system. *Microbiology* **155**: 2856-2865.

715 Underhill, S.A.M., Shields, R.C., Kaspar, J.R., Haider, M., Burne, R.A., and Hagen, S.J.  
716 (2018) Intracellular Signaling by the *comRS* System in *Streptococcus mutans* Genetic  
717 Competence. *mSphere* **3**: e00444-18.

718 Wilkening, R.V., Chang, J.C., and Federle, M.J. (2016) PepO, a CovRS-controlled  
719 endopeptidase, disrupts *Streptococcus pyogenes* quorum sensing. *Molecular*  
720 *Microbiology* **99**: 71-87.

721

722

## 723 **Figure Legends**

### 724 **Fig. 1: current model of CSP induction of competence**

725 CSP induction of competence in *S. mutans* (Shanker; Federle, 2017; Underhill *et al.*,  
726 2018). CSP binds the ComD transmembrane kinase, which phosphorylates ComE.  
727 ComE phosphate activates bacteriocin genes including *cipB*, which through an unknown  
728 mechanism stimulates the ComRS positive feedback system. ComS interacts with  
729 ComR to form a transcriptional activator for *comS* and *comX*. Positive transcriptional  
730 feedback in *comS* amplifies fluctuations in ComS levels, allowing cells to stochastically  
731 flip the ComRS system from a transcriptionally *OFF* to *ON* state and drive *comX*  
732 transcription. Degradation of basal ComS by an unidentified peptidase is hypothesized  
733 to inhibit activation of ComRS (Son, M. *et al.*, 2012). Cell to cell variability in the state of  
734 the ComRS switch leads to bimodal expression of a *PcomX-gfp* reporter in a population  
735 of *S. mutans*. The inset at bottom shows a histogram of individual cell reporter  
736 fluorescence for cells supplied 1  $\mu$ M CSP in complex growth medium (TV). Overlaid (red  
737 curves) are gamma probability distribution functions corresponding to OFF (left) and ON  
738 (right) states of the ComRS/*comX* system. (*Methods*).

739

### 740 **Fig. 2: replacement of glucose by trehalose produces graded increase in** 741 **percentage of cells responding to CSP**

742 (A) Effect on *comX* activation of replacing glucose with trehalose as the carbon source.  
743 Carbohydrate composition of the TV medium was adjusted subject to the constraint  
744  $2[\text{tre}] + [\text{glc}] = 20$  mM. In each sample 1  $\mu$ M CSP was added at OD<sub>600</sub> 0.1, and cell  
745 responses were measured by fluorescence microscopy. Data show the percentage of

746 cells expressing *comX* vs. [CSP] in the wild type reporting background (blue) and a *treR*  
747 mutant (mutant that does not express the *tre* operon, red). Solid curves of  
748 corresponding colors represent  $n = 1$  Hill function fits to the curves. (B) Median  
749 fluorescence of *PcipB-gfp* activity in glucose- (blue) and trehalose- (red) grown cells.

750 **Fig. 3: transformation efficiency is affected by carbohydrate only in the presence**  
751 **of CSP**

752 Transformation efficiency (expressed as % transforming) in indicated genetic  
753 backgrounds in glucose (red), trehalose (green), glucose with 1  $\mu$ M added CSP (blue)  
754 or trehalose with 1  $\mu$ M added CSP (yellow).

755 **Fig. 4: RT-qPCR measurement of gene expression modulation by sugar and CSP**

756 RT-qPCR measurements of indicated transcripts normalized to 16S rRNA. Bars are  
757 grouped by strain and carbohydrate in color and correspond to 0, 4 nM and 400 nM  
758 added CSP from left to right within a color group. (A) *comS* expression. (B) *comR*  
759 expression. (C) *pepO* expression. (D) *smu.2035* expression.

760 **Fig. 5: *pepO* deletion results in carbohydrate-dependent unimodal response to**  
761 **CSP**

762 Percentage of *PcomX-gfp* cells responding to CSP in TV medium supplemented with  
763 different sugars. Percentages are determined by comparing the area under the high  
764 and low-fluorescence peaks in the population distribution (see *Methods*). (A) Response  
765 of *PcomX-gfp/UA159* in glucose (green), trehalose (blue) or maltose (red). (B)  
766 Histogram of GFP fluorescence for individual cells provided with 5  $\mu$ M CSP in glucose,  
767 demonstrating bimodal response. (C) Response of *PcomX-gfp  $\Delta$ pepO* strain in different

768 carbohydrates, using same color code as in (A). (D) Single-cell histogram for *PcomX-*  
769 *gfp ΔpepO* strain in glucose with 5 μM CSP, showing near unimodal (>90%) activation  
770 by CSP in glucose. (E) Comparison of the above *PcomX-gfp/UA159* (green) data and  
771 *PcomX-gfp ΔpepO* (blue) data to a *PcomX-gfp ΔpepO pepO<sup>+</sup>* (complemented) strain  
772 (red), all grown in glucose. (F) Histogram of single-cell fluorescence of *pepO*  
773 complemented strain, grown in glucose with 5 μM CSP, showing restoration of the  
774 bimodal distribution seen in (B).

775 **Fig. 6: CSP-mediated activation of *comX* in a defined medium**

776 *PcomX-gfp ΔpepO* fluorescence response to indicated concentrations of added CSP in  
777 the defined medium FMC as measured by fluorescence microscopy in (A) glucose and  
778 (B) trehalose.

779 **Fig. 7: PepO degrades XIP *in vitro***

780 Effect of rPepO protein on synthetic XIP. (A) Effect of XIP incubation time with rPepO  
781 on a fluorescence polarization assay for XIP/ComR binding to the *comX* promoter. 500  
782 nM rPepO was added to 5 μM synthetic XIP, and fluorescence polarization  
783 measurements were then taken after the indicated incubation times, using a  
784 fluorescently-labeled DNA aptamer and 1 μM purified recombinant ComR. (B), (C)  
785 Different concentrations of rPepO added to 5 μM synthetic XIP and fluorescence  
786 polarization measurements similar to (A) taken at 2 and 5 hours of incubation  
787 respectively. (D) Fluorescence response of *PcomX-gfp ΔcomS* cells to addition of  
788 rPepO-treated XIP added to culture in 1:4 dilution after 5 hours of rPepO treatment.

789

790 **Fig. 8: integration of carbohydrate effects into existing competence regulation**

791 **models**

792 (A) *PcipB-gfp* and *PcomX-gfp* expression data from Figs. 2 and 5 (glucose, wild type)  
793 on a double y-axis plot showing the difference in [CSP] threshold between *comX* and  
794 *cipB*. (B) Model for the influence of carbohydrate on the *comX*-activating fraction of the  
795 population, in response to CSP. An unknown mechanism Z increases *comR*  
796 transcription under stimulation by CSP, but is repressed by glucose, such that *comR* is  
797 only significantly upregulated in the other carbohydrates tested. A parallel pathway Y is  
798 also postulated, through which phosphorylated ComE is able to stimulate *comS* via  
799 expression of *cipB*. The response of *comS* to CSP stimulation requires the  
800 autofeedback amplification of fluctuations in [ComS], which is repressed by PepO-  
801 mediated degradation, limiting the proportion of the population that activates *comX*.

802 **Table 1: strains and plasmids used**

803 List of strains and plasmids used in this study, their relevant characteristics, and the  
804 source or reference for the material.

805 **Table 2: oligonucleotides used**

806 Primers used for this study, including qPCR primers. Restriction enzyme sites are  
807 underlined.

808

809

810

811

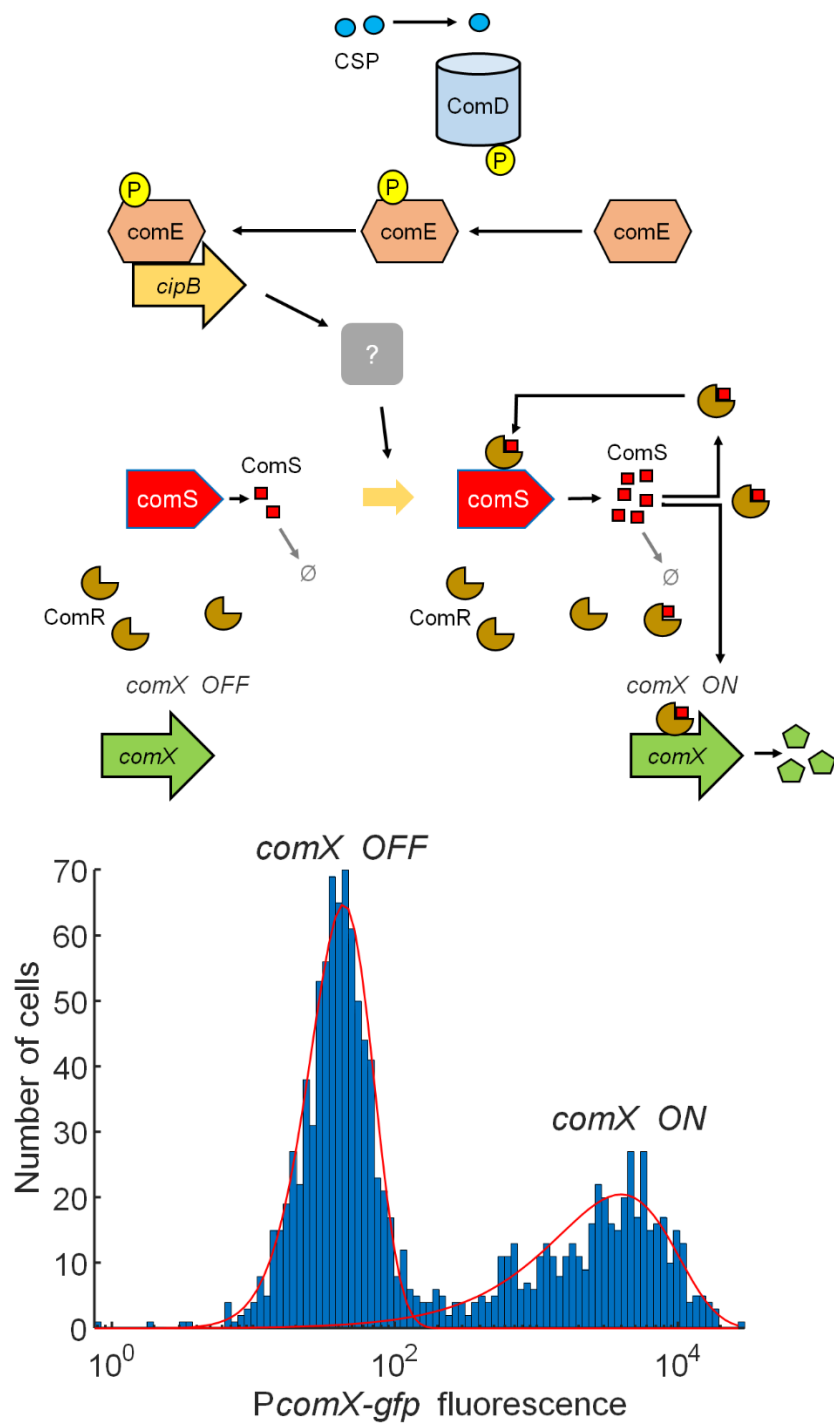

812

813

814

**Fig. 1**

815

816

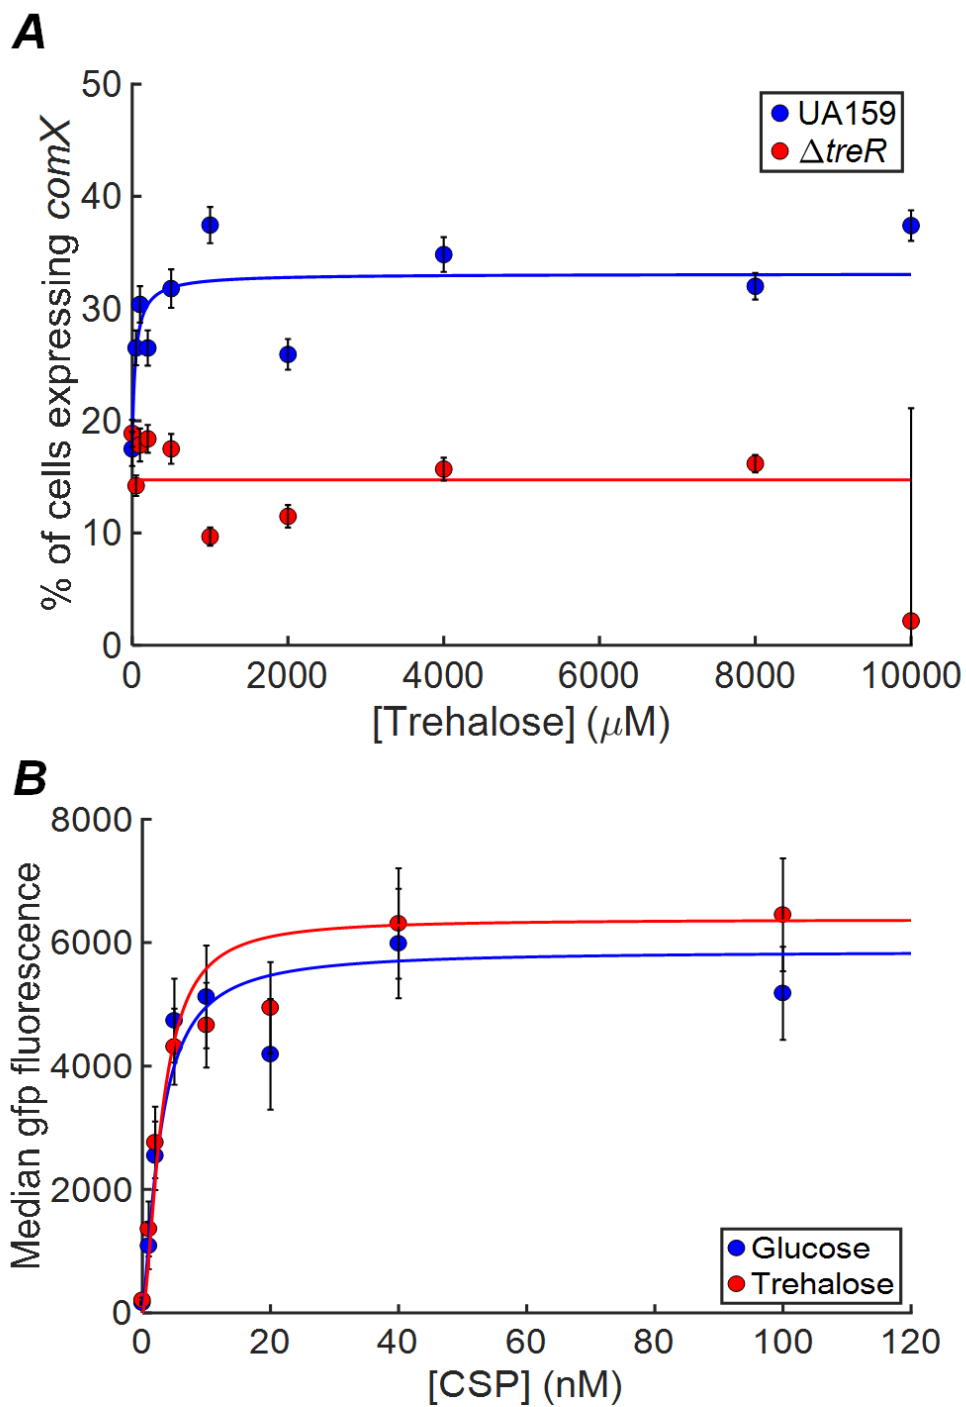

817

818

819

**Fig. 2**

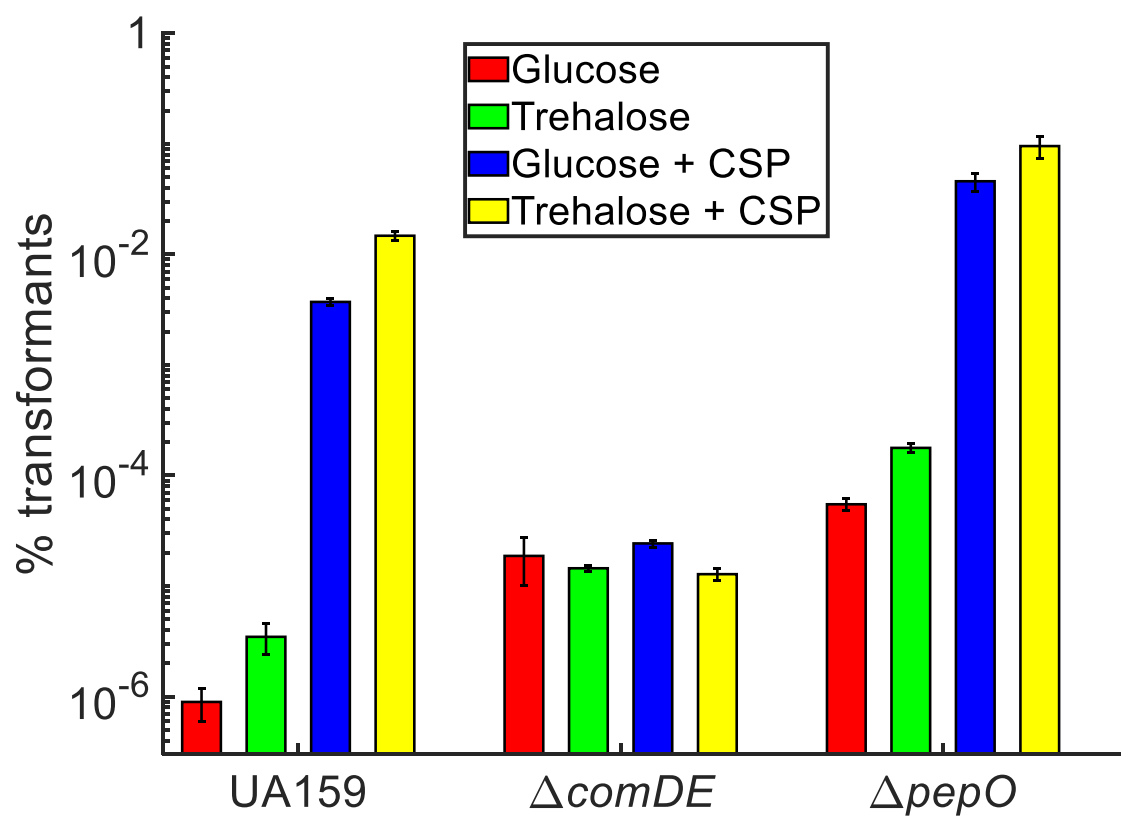

820

821

Fig. 3



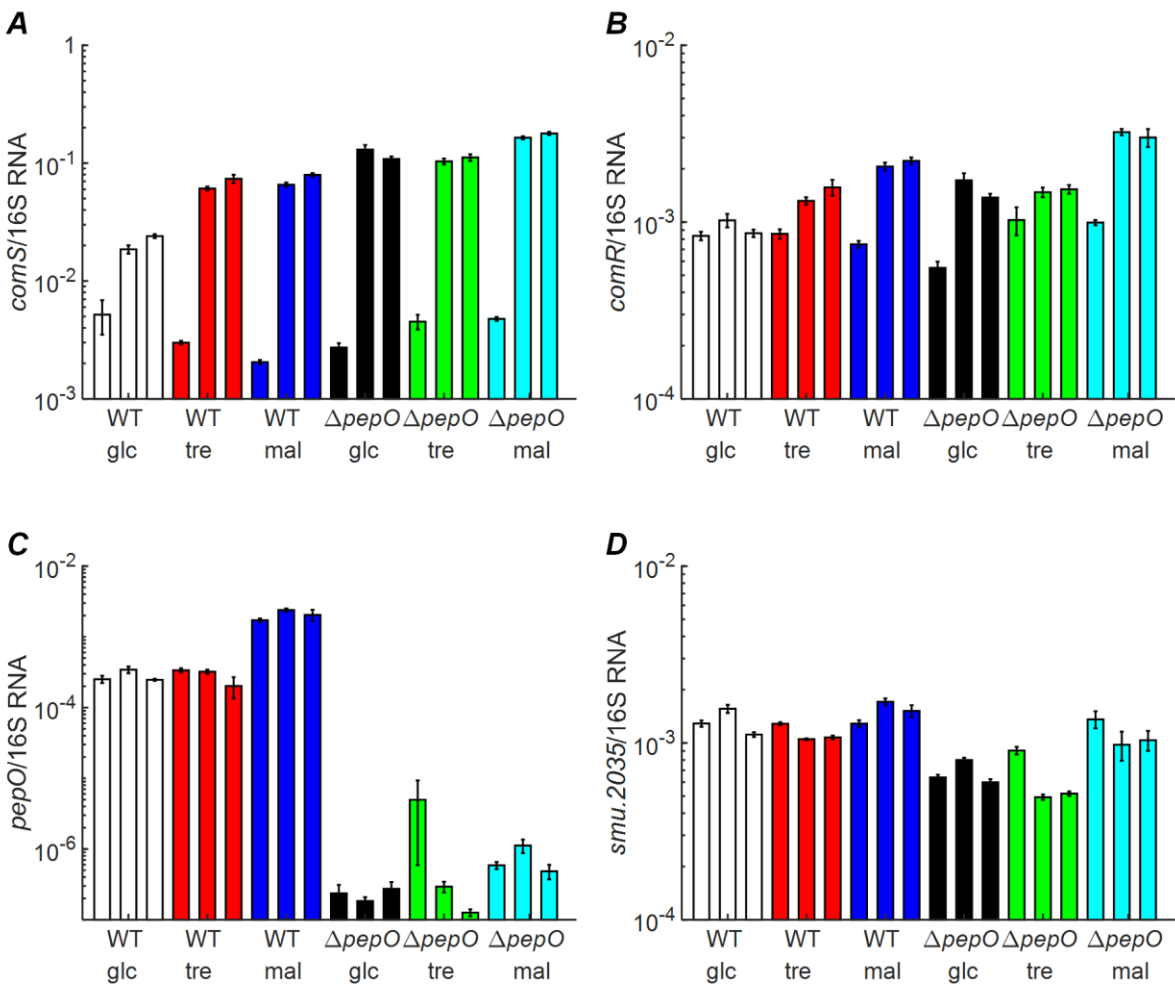

822

823

824

**Fig. 4**

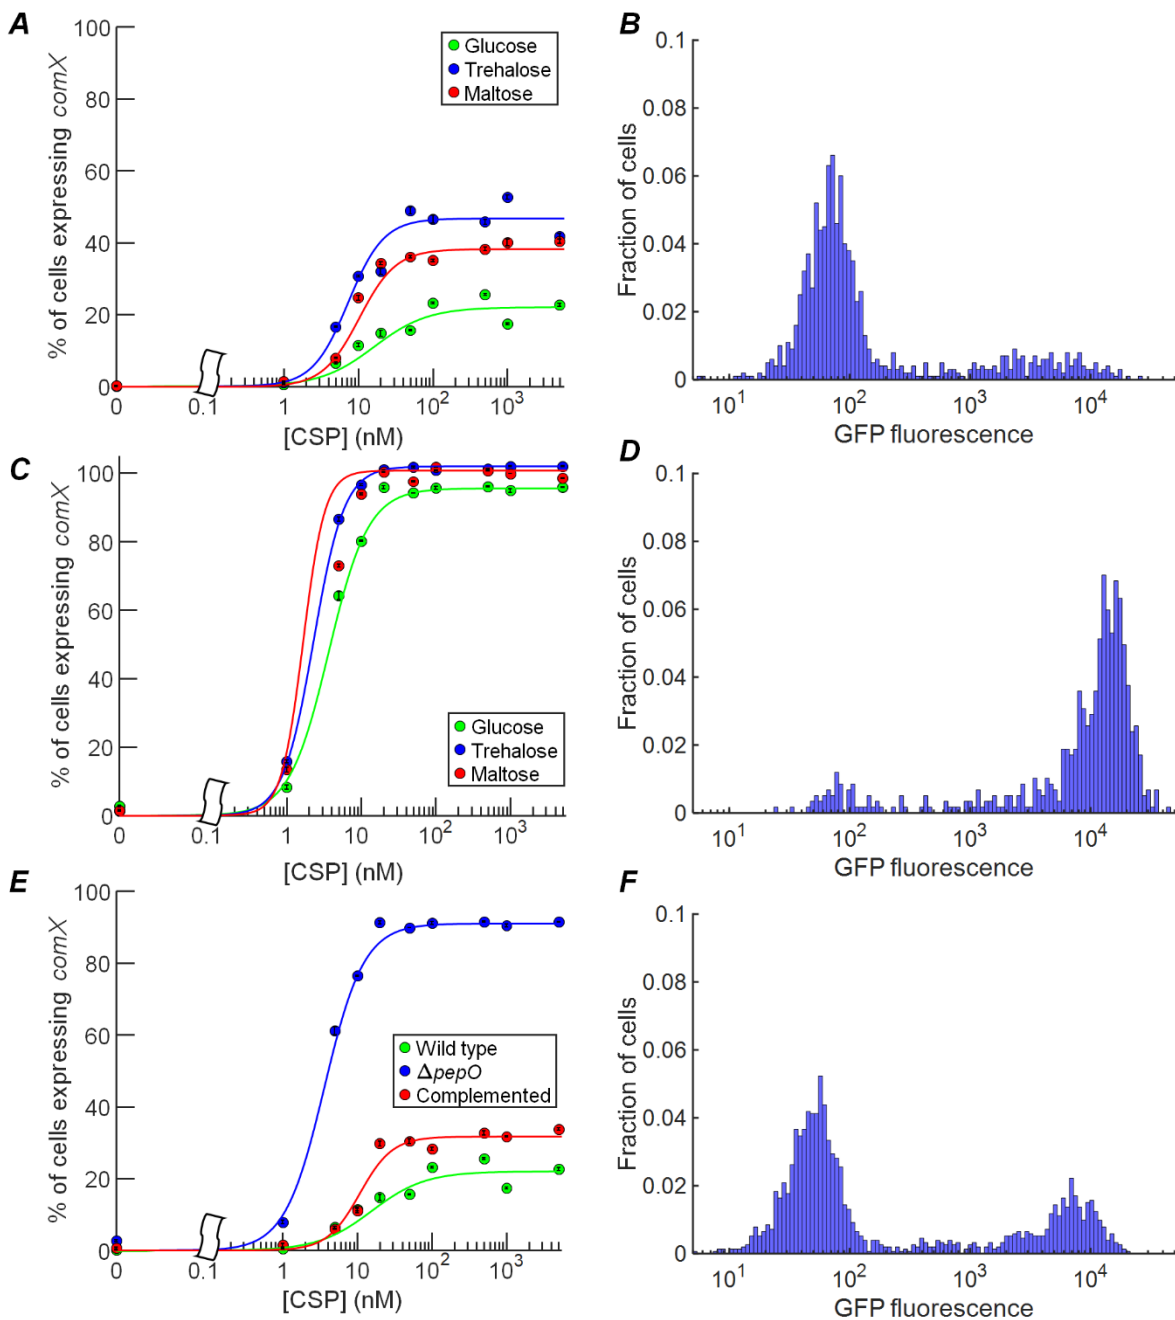

825

826

**Fig. 5**

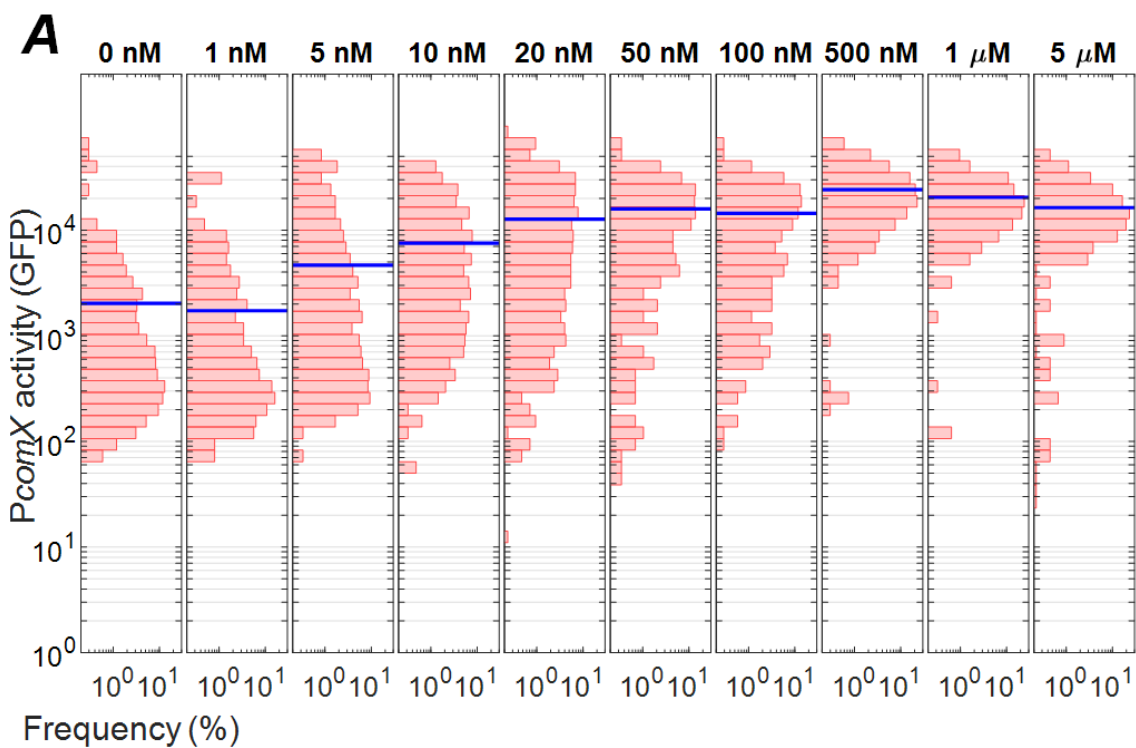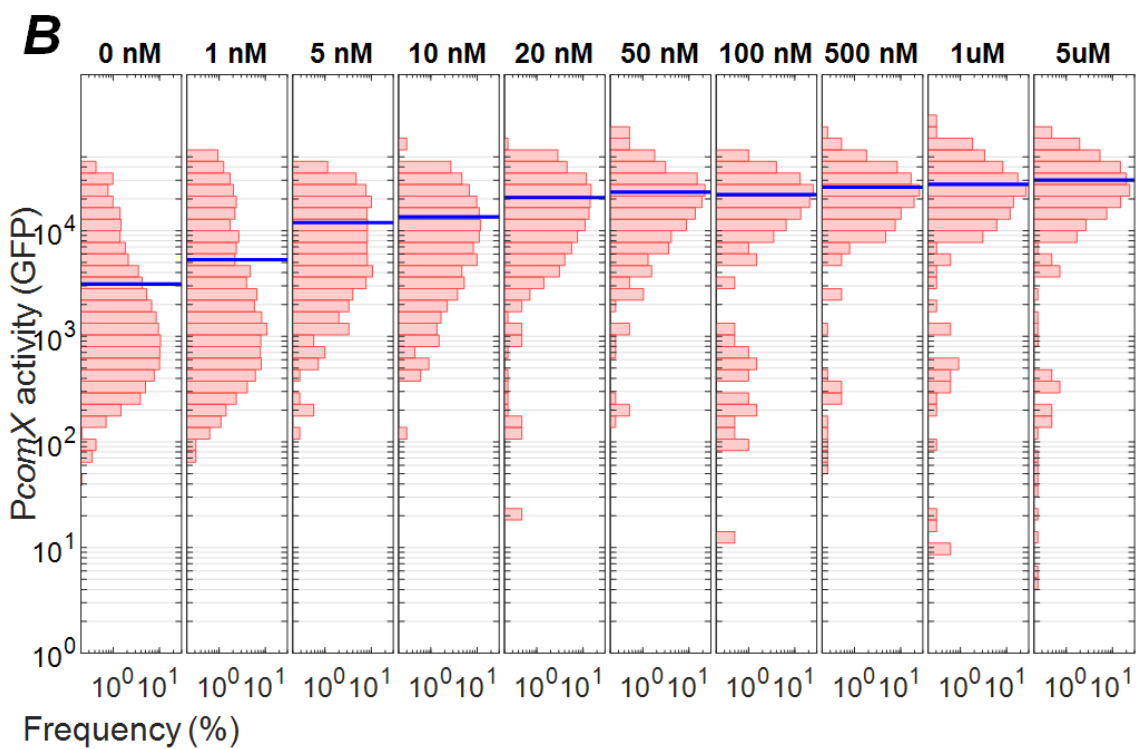

827

828

**Fig. 6**

829

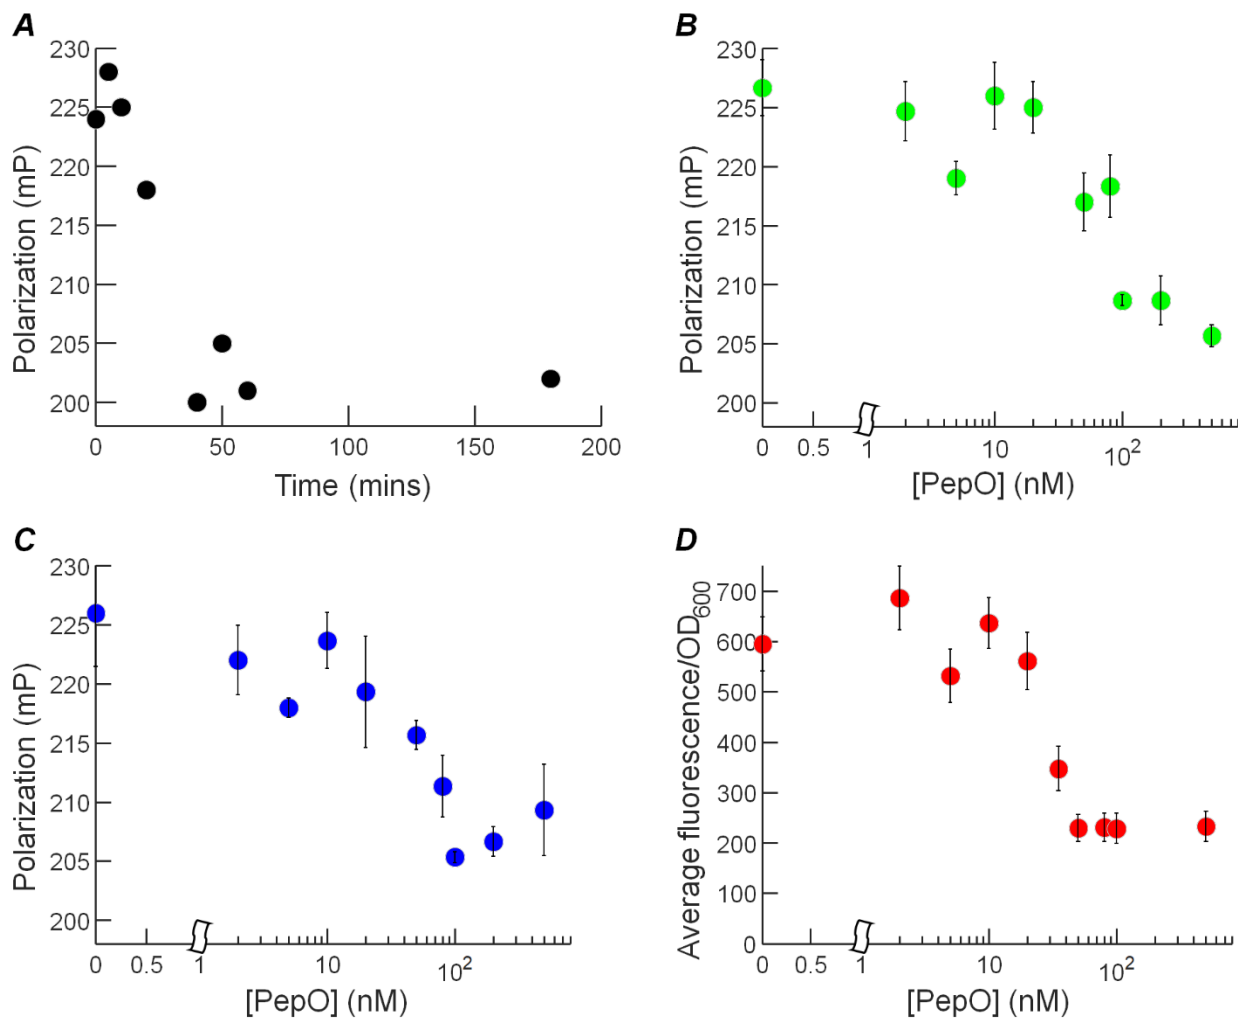

830

831

832

**Fig. 7**

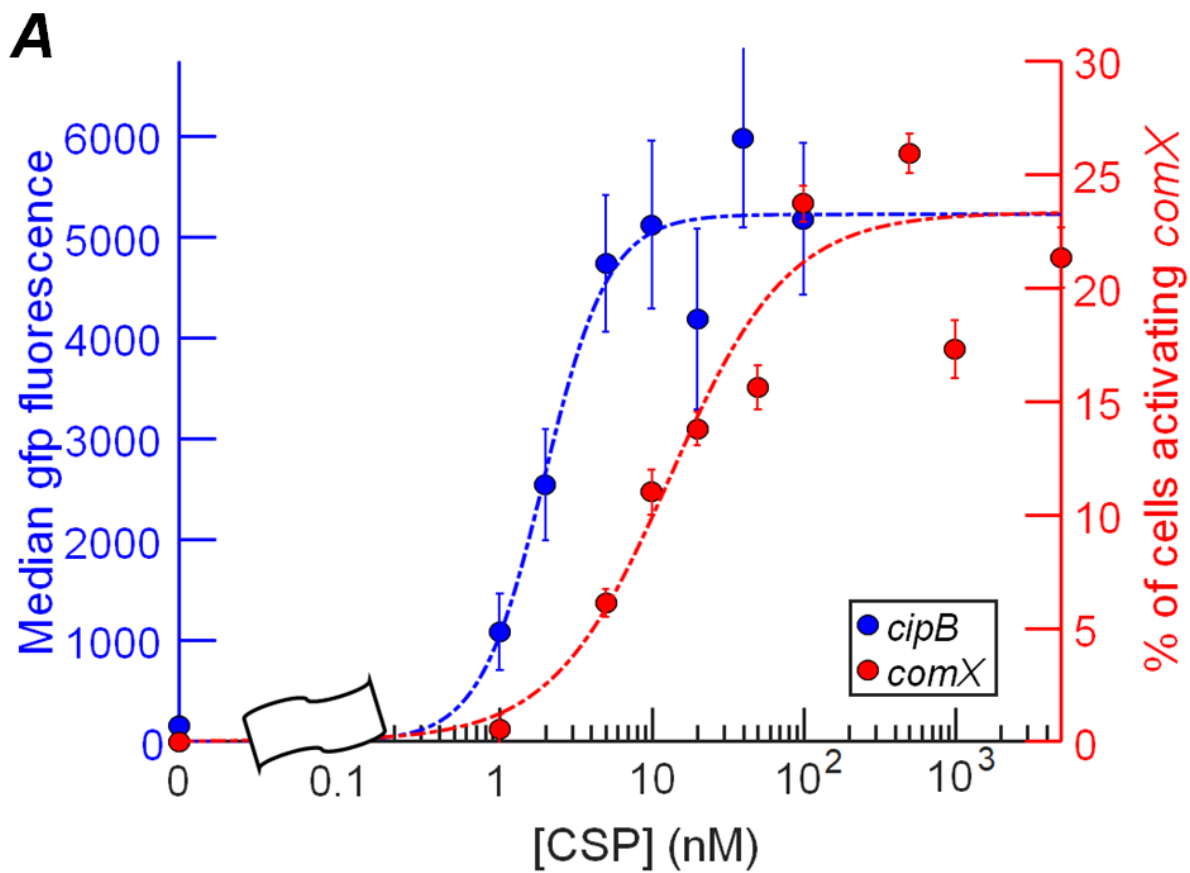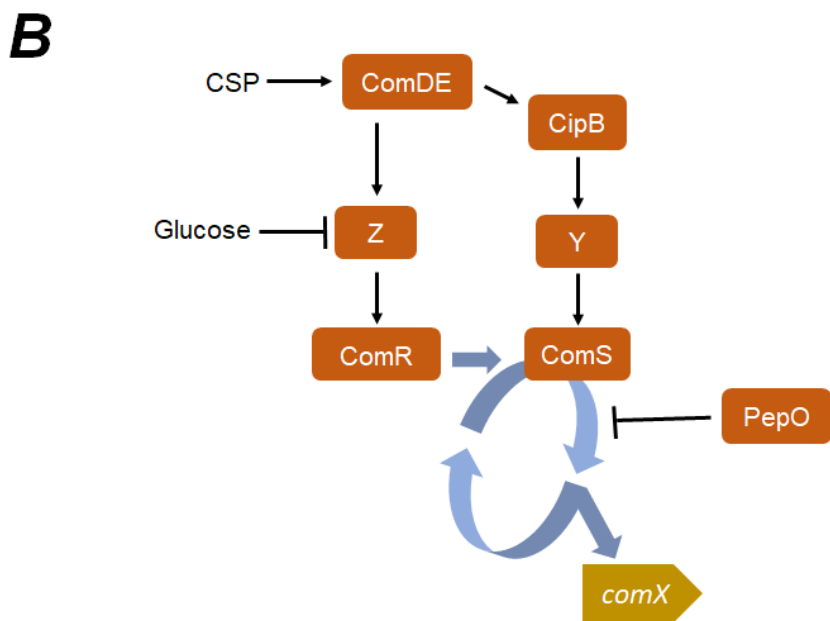

833

834

**Fig. 8**
